# Supplementary material for: Redox Homeostasis Disclosed in the Saltmarsh Plant Halimione portulacoides upon Short Waterborne Exposure to Inorganic Mercury
Source: MDPI journal article supplement (doi:10.3390/toxics12030211), 2024-03-12
Supplement: s1 [file s1]

## Supplementary Material

**Table S1.** Two-way ANOVA summary regarding the inspection of significant effects of Hg concentration, site of origin of tested plants, and their interactions, regarding iHg concentrations in roots, stems or leaves measured following 2 or 4 h of exposure in experiments held during the day or night.

| WINTER              |               |         |        |        |               |         |        |       |                 |         |        |        |                 |         |         |       |
|---------------------|---------------|---------|--------|--------|---------------|---------|--------|-------|-----------------|---------|--------|--------|-----------------|---------|---------|-------|
| Source of variation | DAY . t = 2 h |         |        |        | DAY . t = 4 h |         |        |       | NIGHT . t = 2 h |         |        |        | NIGHT . t = 4 h |         |         |       |
|                     | df            | MS      | F      | P      | df            | MS      | F      | P     | df              | MS      | F      | P      | df              | MS      | F       | P     |
| ROOTS               |               |         |        |        |               |         |        |       |                 |         |        |        |                 |         |         |       |
| [iHg]               | 1             | 0.0761  | 39.323 | <0.001 | 1             | 0.0035  | 1.158  | 0.313 | 1               | 0.0057  | 0.786  | 0.401  | 1               | 0.0024  | 2.607   | 0.150 |
| Site                | 1             | 0.0386  | 19.941 | 0.002  | 1             | 0.0130  | 4.287  | 0.072 | 1               | 0.0084  | 1.166  | 0.312  | 1               | 1.45e-4 | 0.158   | 0.730 |
| [iHg]*Site          | 1             | 0.0452  | 23.390 | 0.001  | 1             | 0.0015  | 0.507  | 0.497 | 1               | 0.0062  | 0.864  | 0.380  | 1               | 0.0031  | 3.412   | 0.107 |
| Error               | 8             | 0.0155  |        |        | 8             | 0.0030  |        |       | 8               | 0.0072  |        |        | 7               | 9.13e-4 |         |       |
| STEMS               |               |         |        |        |               |         |        |       |                 |         |        |        |                 |         |         |       |
| [iHg]               | 1             | 0.0068  | 15.92  | 0.004  | 1             | 0.0023  | 2.672  | 0.141 | 1               | 0.0013  | 2.092  | 0.186  | 1               | 9.99e-5 | 0.113   | 0.745 |
| Site                | 1             | 0.0027  | 6.210  | 0.037  | 1             | 0.0073  | 8.455  | 0.020 | 1               | 0.0114  | 19.016 | 0.002  | 1               | 0.0135  | 15.32   | 0.004 |
| [iHg]*Site          | 1             | 8.07e-5 | 0.188  | 0.676  | 1             | 1.80e-6 | 0.002  | 0.965 | 1               | 2.17e-4 | 0.362  | 0.564  | 1               | 0.0020  | 2.289   | 0.169 |
| Error               | 8             | 4.30e-4 |        |        | 8             | 8.63e-4 |        |       | 8               | 6.00e-4 |        |        | 8               | 8.83e-4 |         |       |
| LEAVES              |               |         |        |        |               |         |        |       |                 |         |        |        |                 |         |         |       |
| [iHg]               | 1             | 9.66e-5 | 0.028  | 0.871  | 1             | 0.0108  | 0.999  | 0.347 | 1               | 0.0089  | 1.492  | 0.257  | 1               | 8.43e-5 | 0.008   | 0.931 |
| Site                | 1             | 0.0074  | 2.152  | 0.181  | 1             | 0.0023  | 0.218  | 0.653 | 1               | 0.0046  | 0.770  | 0.406  | 1               | 0.0072  | 0.685   | 0.432 |
| [iHg]*Site          | 1             | 0.0068  | 1.980  | 0.197  | 1             | 0.0080  | 0.741  | 0.414 | 1               | 0.0098  | 1.644  | 0.236  | 1               | 0.0043  | 0.411   | 0.539 |
| Error               | 8             | 0.0035  |        |        | 8             | 0.0108  |        |       | 8               | 0.0060  |        |        | 8               | 0.0105  |         |       |
| SUMMER              |               |         |        |        |               |         |        |       |                 |         |        |        |                 |         |         |       |
| Source of variation | DAY . t = 2 h |         |        |        | DAY . t = 4 h |         |        |       | NIGHT . t = 2 h |         |        |        | NIGHT . t = 4 h |         |         |       |
|                     | df            | MS      | F      | P      | df            | MS      | F      | P     | df              | MS      | F      | P      | df              | MS      | F       | P     |
| ROOTS               |               |         |        |        |               |         |        |       |                 |         |        |        |                 |         |         |       |
| [iHg]               | 1             | 0.0012  | 1.279  | 0.291  | 1             | 1.95e-5 | 0.078  | 0.787 | 1               | 0.0018  | 1.949  | 0.200  | 1               | 0.0034  | 7.327   | 0.030 |
| Site                | 1             | 0.0097  | 10.27  | 0.013  | 1             | 0.0038  | 15.23  | 0.005 | 1               | 0.0235  | 26.13  | <0.001 | 1               | 0.0064  | 13.59   | 0.008 |
| [iHg]*Site          | 1             | 8.67e-6 | 0.009  | 0.926  | 1             | 5.94e-5 | 0.237  | 0.640 | 1               | 4.69e-4 | 0.521  | 0.491  | 1               | 0.0012  | 2.565   | 0.153 |
| Error               | 8             | 9.42e-4 |        |        | 8             | 2.51e-4 |        |       | 8               | 8.99e-4 |        |        | 7               | 4.69e-4 |         |       |
| STEMS               |               |         |        |        |               |         |        |       |                 |         |        |        |                 |         |         |       |
| [iHg]               | 1             | 2.59e-4 | 4.278  | 0.072  | 1             | 8.16e-5 | 0.829  | 0.389 | 1               | 2.08e-6 | 0.010  | 0.923  | 1               | 1.33e-6 | 0.0185  | 0.895 |
| Site                | 1             | 2.05e-5 | 0.340  | 0.576  | 1             | 4.41e-7 | 0.0045 | 0.948 | 1               | 8.33e-8 | 0.0004 | 0.985  | 1               | 0.00154 | 21.358  | 0.002 |
| [iHg]*Site          | 1             | 9.67e-4 | 15.994 | 0.004  | 1             | 1.82e-4 | 1.846  | 0.211 | 1               | 6.75e-6 | 0.0325 | 0.861  | 1               | 1.47e-4 | 2.037   | 0.191 |
| Error               | 8             | 6.04e-5 |        |        | 8             | 9.85e-5 |        |       | 8               | 2.08e-4 |        |        | 8               | 7.22e-5 |         |       |
| LEAVES              |               |         |        |        |               |         |        |       |                 |         |        |        |                 |         |         |       |
| [iHg]               | 1             | 0.0212  | 2.459  | 0.156  | 1             | 0.0148  | 5.322  | 0.050 | 1               | 0.0135  | 2.700  | 0.139  | 1               | 6.75e-6 | 6.38e-4 | 0.980 |
| Site                | 1             | 0.0299  | 3.478  | 0.099  | 1             | 1.04e-4 | 0.037  | 0.852 | 1               | 0.0237  | 4.723  | 0.061  | 1               | 0.0037  | 0.350   | 0.570 |
| [iHg]*Site          | 1             | 0.0024  | 0.280  | 0.611  | 1             | 0.0150  | 5.398  | 0.049 | 1               | 0.0023  | 0.453  | 0.520  | 1               | 8.17e-4 | 0.0772  | 0.788 |
| Error               | 8             | 0.0086  |        |        | 8             | 0.0028  |        |       | 8               | 0.0050  |        |        | 8               | 0.0106  |         |       |

\*Homocedasticity failed (Levene's test;  $p < 0.05$ ); \*Normality failed (Shapiro-Wilk test;  $p > 0.05$ ). Parametric ANOVA was still run, considering that very few cases occurred and to keep consistency across the analysis.

**Table S2.** Two-way ANOVA summary regarding the inspection of significant effects of iHg concentration, site of origin of tested plants, and their interactions, in leaves, for different oxidative stress and damage endpoints measured following 2 or 4 h of exposure during experiments held during the day or night.

| WINTER  |                     |               |         |       |              |               |         |         |                  |                 |         |        |                  |                 |         |        |              |
|---------|---------------------|---------------|---------|-------|--------------|---------------|---------|---------|------------------|-----------------|---------|--------|------------------|-----------------|---------|--------|--------------|
|         |                     | DAY . t = 2 h |         |       |              | DAY . t = 4 h |         |         |                  | NIGHT . t = 2 h |         |        |                  | NIGHT . t = 4 h |         |        |              |
|         | Source of variation | df            | MS      | F     | P            | df            | MS      | F       | P                | df              | MS      | F      | P                | df              | MS      | F      | P            |
| CAT     | [iHg]               | 1             | 1.4967  | 0.15  | 0.709        | 1             | 0.174   | 0.0320  | 0.862            | 1               | 37.125  | 14.307 | <b>0.009</b>     | 1               | 10.943  | 1.562  | 0.247        |
|         | Site                | 1             | 0.0143  | 0.00  | 0.971        | 1             | 0.0246  | 0.00452 | 0.948            | 1               | 1.003   | 0.386  | 0.557            | 1               | 6.796   | 0.970  | 0.354        |
|         | [iHg]*Site          | 1             | 358569  | 3.59  | 0.095        | 1             | 8.255   | 1.519   | 0.253            | 1               | 22.362  | 8.618  | <b>0.026</b>     | 1               | 17.487  | 2.496  | 0.153        |
|         | Error               | 8             | 10.00   |       |              | 8             | 5.434   |         |                  | 6               | 2.595   |        |                  | 8               | 7.005   |        |              |
| AP      | [iHg]               | 1             | 0.24412 | 0.41  | 0.538        | 1             | 1.934   | 1.968   | 0.198            | 1               | 0.0109  | 2.759  | 0.148            | 1               | 9.06e-4 | 0.379  | 0.555        |
|         | Site                | 1             | 0.07787 | 0.13  | 0.726        | 1             | 0.553   | 0.563   | 0.475            | 1               | 0.0225  | 0.571  | 0.478            | 1               | 0.0589  | 2.461  | 0.155        |
|         | [iHg]*Site          | 1             | 0.87106 | 1.48  | 0.259        | 1             | 1.744   | 1.775   | 0.219            | 1               | 9.06e-4 | 0.230  | 0.649            | 1               | 0.0769  | 3.210  | 0.111        |
|         | Error               | 8             | 0.59049 |       |              | 8             | 0.983   |         |                  | 6               | 0.00394 |        |                  | 8               | 0.0239  |        |              |
| GP      | [iHg]               | 1             | 920.30  | 7.73  | <b>0.027</b> | 1             | 0.285   | 0.00451 | 0.948            | 1               | 1018.40 | 20.608 | <b>0.002</b>     | 1               | 674.443 | 5.179  | 0.052        |
|         | Site                | 1             | 77.82   | 0.65  | 0.446        | 1             | 2.708   | 0.0427  | 0.841            | 1               | 39.326  | 0.796  | 0.398            | 1               | 95.023  | 0.730  | 0.418        |
|         | [iHg]*Site          | 1             | 95.86   | 0.80  | 0.399        | 1             | 705.500 | 11.135  | <b>0.010</b>     | 1               | 608.857 | 12.321 | <b>0.008</b>     | 1               | 349.093 | 2.680  | 0.140        |
|         | Error               | 7             | 119.10  |       |              | 8             | 63.358  |         |                  | 8               | 49.418  |        |                  | 8               | 130.238 |        |              |
| SO<br>D | [iHg]               | 1             | 8.618   | 6.45  | <b>0.044</b> | 1             | 47.834  | 12.924  | <b>0.011</b>     | 1               | 10.996  | 11.765 | <b>0.011</b>     | 1               | 0.0467  | 0.0256 | 0.877        |
|         | Site                | 1             | 46.136  | 34.53 | <b>0.001</b> | 1             | 54.719  | 14.785  | <b>0.009</b>     | 1               | 9.755   | 10.437 | <b>0.014</b>     | 1               | 0.0288  | 0.0158 | 0.903        |
|         | [iHg]*Site          | 1             | 6.971   | 5.22  | 0.062        | 1             | 36.724  | 9.923   | <b>0.020</b>     | 1               | 0.604   | 0.646  | 0.448            | 1               | 0.271   | 0.148  | 0.710        |
|         | Error               | 6             | 1.336   |       |              | 6             | 3.701   |         |                  | 7               | 0.935   |        |                  | 8               | 1.827   |        |              |
| LPO     | [iHg]               | 1             | 1.79e-4 | 11.63 | <b>0.009</b> | 1             | 8.92e-5 | 25.625  | <b>&lt;0.001</b> | 1               | 2.16e-5 | 1.028  | 0.340            | 1               | 1.17e-5 | 1.654  | 0.234        |
|         | Site                | 1             | 6.73e-6 | 0.437 | 0.527        | 1             | 1.17e-4 | 33.546  | <b>&lt;0.001</b> | 1               | 4.11e-5 | 1.954  | 0.200            | 1               | 1.95e-5 | 2.754  | 0.136        |
|         | [iHg]*Site          | 1             | 7.13e-6 | 0.463 | 0.515        | 1             | 3.11e-5 | 8.932   | <b>0.017</b>     | 1               | 2.22e-5 | 1.052  | 0.335            | 1               | 2.76e-5 | 3.888  | 0.084        |
|         | Error               | 8             | 1.54e-5 |       |              | 8             | 3.48e-6 |         |                  | 8               | 2.11e-5 |        |                  | 8               | 7.10e-6 |        |              |
| SUMMER  |                     |               |         |       |              |               |         |         |                  |                 |         |        |                  |                 |         |        |              |
|         |                     | DAY . t = 2 h |         |       |              | DAY . t = 4 h |         |         |                  | NIGHT . t = 2 h |         |        |                  | NIGHT . t = 4 h |         |        |              |
|         | Source of variation | df            | MS      | F     | P            | df            | MS      | F       | P                | df              | MS      | F      | P                | df              | MS      | F      | P            |
| CAT     | [iHg]               | 1             | 2256.51 | 3.275 | 0.120        | 1             | 64.989  | 0.117   | 0.741            | 1               | 2233.06 | 8.815  | <b>0.025</b>     | 1               | 7177.9  | 17.965 | <b>0.003</b> |
|         | Site                | 1             | 57.499  | 0.083 | 0.782        | 1             | 150.720 | 0.271   | 0.617            | 1               | 11954.6 | 47.189 | <b>&lt;0.001</b> | 1               | 149.43  | 0.374  | 0.558        |
|         | [iHg]*Site          | 1             | 33.266  | 0.048 | 0.833        | 1             | 1425.55 | 2.561   | 0.148            | 1               | 781.344 | 3.084  | 0.130            | 1               | 2214.9  | 5.544  | <b>0.046</b> |
|         | Error               | 9             | 689.074 |       |              | 8             | 556.641 |         |                  | 6               | 253.336 |        |                  | 8               | 399.55  |        |              |
| SO<br>D | [iHg]               | 1             | 233.539 | 2.828 | 0.136        | 1             | 0.0120  | 0.463   | 0.518            | 1               | 22.499  | 0.126  | 0.733            | 1               | 259.12  | 4.495  | 0.067        |
|         | Site                | 1             | 77.259  | 0.936 | 0.366        | 1             | 0.381   | 14.679  | <b>0.006</b>     | 1               | 39.507  | 0.222  | 0.652            | 1               | 155.13  | 2.691  | 0.140        |
|         | [iHg]*Site          | 1             | 377.358 | 4.570 | 0.070        | 1             | 0.0094  | 0.363   | 0.566            | 1               | 23.541  | 0.132  | 0.727            | 1               | 17.821  | 0.309  | 0.593        |
|         | Error               | 7             | 82.572  |       |              | 7             | 0.363   |         |                  | 7               | 178.340 |        |                  | 8               | 57.651  |        |              |
| LPO     | [iHg]               | 1             | 7.61e-5 | 18.71 | <b>0.003</b> | 1             | 3.42e-6 | 0.839   | 0.386            | 1               | 1.10e-4 | 23.393 | <b>0.001</b>     | 1               | 1.62e-4 | 1.910  | 0.204        |
|         | Site                | 1             | 5.50e-6 | 1.354 | 0.278        | 1             | 1.83e-6 | 0.447   | 0.522            | 1               | 1.44e-6 | 0.308  | 0.594            | 1               | 1.06e-4 | 1.253  | 0.295        |
|         | [iHg]*Site          | 1             | 1.63e-5 | 4.008 | 0.080        | 1             | 1.01e-7 | 0.0248  | 0.879            | 1               | 5.76e-6 | 1.229  | 0.300            | 1               | 2.76e-4 | 3.260  | 0.109        |
|         | Error               | 8             | 4.07e-6 |       |              | 8             | 4.08e-6 |         |                  | 8               | 4.69e-6 |        |                  | 8               | 8.46e-5 |        |              |

×Homocedasticity failed (Levene's test;  $p < 0.05$ ), despite several attempts to transform the data – parametric ANOVA was still run, considering that very few cases occurred and to keep consistency across the analysis.

**Table S3.** Two-way ANOVA summary regarding the inspection of significant effects of iHg concentration, site of origin of tested plants, and their interactions, in roots, for different oxidative stress and damage endpoints measured following 2 or 4 h of exposure during experiments held during the day or night.

| WINTER |                     |               |          |         |              |               |         |         |              |                 |         |         |              |                 |         |        |              |
|--------|---------------------|---------------|----------|---------|--------------|---------------|---------|---------|--------------|-----------------|---------|---------|--------------|-----------------|---------|--------|--------------|
|        |                     | DAY . t = 2 h |          |         |              | DAY . t = 4 h |         |         |              | NIGHT . t = 2 h |         |         |              | NIGHT . t = 4 h |         |        |              |
|        | Source of variation | df            | MS       | F       | P            | df            | MS      | F       | P            | df              | MS      | F       | P            | df              | MS      | F      | P            |
| CAT    | [iHg]               | 1             | 2.394    | 0.861   | 0.381        | 1             | 1.527   | 0.858   | 0.381        | 1               | 0.752   | 0.303   | 0.597        | 1               | 9.332   | 3.776  | 0.093        |
|        | Site                | 1             | 0.859    | 0.309   | 0.594        | 1             | 0.496   | 0.279   | 0.612        | 1               | 0.0573  | 0.0230  | 0.883        | 1               | 0.423   | 0.171  | 0.692        |
|        | [iHg]*Site          | 1             | 0.589    | 0.212   | 0.658        | 1             | 0.162   | 0.0909  | 0.771        | 1               | 0.322   | 0.130   | 0.728        | 1               | 4.939   | 1.999  | 0.200        |
|        | Error               | 8             | 2.781    |         |              | 8             | 1.780   |         |              | 8               | 2.485   |         |              | 7               | 2.471   |        |              |
| AP     | [iHg]               | 1             | 0.461    | 1.815   | 0.215        | 1             | 0.0186  | 0.0874  | 0.776        | 1               | 0.170   | 0.591   | 0.464        | 1               | 2.452   | 15.417 | <b>0.006</b> |
|        | Site                | 1             | 0.0910   | 0.359   | 0.566        | 1             | 0.343   | 1.611   | 0.245        | 1               | 0.276   | 0.958   | 0.356        | 1               | 0.517   | 3.251  | 0.114        |
|        | [iHg]*Site          | 1             | 0.286    | 1.128   | 0.319        | 1             | 0.666   | 3.127   | 0.120        | 1               | 0.548   | 1.907   | 0.205        | 1               | 0.103   | 0.645  | 0.448        |
|        | Error               | 8             | 0.254    |         |              | 7             | 0.213   |         |              | 8               | 0.288   |         |              | 7               | 0.159   |        |              |
| GP     | [iHg]               | 1             | 71.872   | 7.370   | <b>0.026</b> | 1             | 3.800   | 0.284   | 0.609        | 1               | 48.411  | 3.006   | 0.127        | 1               | 2.945   | 0.391  | 0.555        |
|        | Site                | 1             | 2.369    | 0.243   | 0.635        | 1             | 11.000  | 0.821   | 0.391        | 1               | 59.562  | 3.698   | 0.096        | 1               | 0.121   | 0.0160 | 0.903        |
|        | [iHg]*Site          | 1             | 17.942   | 1.840   | 0.212        | 1             | 1.213   | 0.0906  | 0.771        | 1               | 8.898   | 0.553   | 0.481        | 1               | 108.008 | 14.350 | <b>0.009</b> |
|        | Error               | 8             | 9.751    |         |              | 8             | 13.391  |         |              | 7               | 16.104  |         |              | 6               | 7.527   |        |              |
| SO     | [iHg]               | 1             | 1.713    | 6.684   | <b>0.032</b> | 1             | 3.542   | 16.191  | <b>0.004</b> | 1               | 2.336   | 3.011   | 0.121        | 1               | 1.26e-4 | 0.0142 | 0.908        |
|        | Site                | 1             | 0.0342   | 0.133   | 0.724        | 1             | 1.474   | 6.736   | <b>0.032</b> | 1               | 0.0546  | 0.0704  | 0.797        | 1               | 0.0601  | 6.785  | <b>0.031</b> |
|        | [iHg]*Site          | 1             | 0.236    | 0.920   | 0.366        | 1             | 1.789   | 8.178   | <b>0.021</b> | 1               | 2.470   | 3.184   | 0.112        | 1               | 0.0635  | 7.180  | <b>0.028</b> |
|        | Error               | 8             | 2.056    |         |              | 8             | 0.219   |         |              | 8               | 0.776   |         |              | 8               | 0.00885 |        |              |
| LPO    | [iHg]               | 1             | 3.04e-5  | 2.690   | 0.140        | 1             | 8.80e-6 | 1.509   | 0.254        | 1               | 0.0424  | 1.674   | 0.232        | 1               | 9.00e-5 | 2.102  | 0.185        |
|        | Site                | 1             | 2.10e-5  | 1.859   | 0.210        | 1             | 3.10e-5 | 5.320   | <b>0.050</b> | 1               | 0.292   | 11.505  | <b>0.009</b> | 1               | 3.34e-5 | 0.780  | 0.403        |
|        | [iHg]*Site          | 1             | 4.86e-6  | 0.430   | 0.530        | 1             | 2.14e-6 | 0.368   | 0.561        | 1               | 1.17e-5 | 4.64e-4 | 0.983        | 1               | 3.08e-5 | 0.720  | 0.421        |
|        | Error               | 8             | 1.13e-5  |         |              | 8             | 5.83e-6 |         |              | 8               | 0.0253  |         |              | 8               | 4.28e-5 |        |              |
| SUMMER |                     |               |          |         |              |               |         |         |              |                 |         |         |              |                 |         |        |              |
|        |                     | DAY . t = 2 h |          |         |              | DAY . t = 4 h |         |         |              | NIGHT . t = 2 h |         |         |              | NIGHT . t = 4 h |         |        |              |
|        | Source of variation | df            | MS       | F       | P            | df            | MS      | F       | P            | df              | MS      | F       | P            | df              | MS      | F      | P            |
| CAT    | [iHg]               | 1             | 5715.07  | 6.787   | 0.040        | 1             | 491.693 | 1.507   | 0.274        | 1               | 3943.41 | 0.415   | 0.548        | 1               | 1143.51 | 0.162  | 0.701        |
|        | Site                | 1             | 4966.28  | 5.898   | 0.051        | 1             | 1000.04 | 3.065   | 0.140        | 1               | 5349.30 | 0.563   | 0.487        | 1               | 70878.0 | 10.040 | 0.019        |
|        | [iHg]*Site          | 1             | 9665.08  | 11.478  | <b>0.015</b> | 1             | 2293.36 | 7.028   | <b>0.045</b> | 1               | 60734.8 | 6.388   | 0.053        | 1               | 46848.6 | 6.636  | <b>0.042</b> |
|        | Error               | 6             | 842.029  |         |              | 8             | 326.317 |         |              | 5               | 9507.69 |         |              | 6               | 7059.80 |        |              |
| SO     | [iHg]               | 1             | 570.109  | 6.759   | <b>0.035</b> | 1             | 4.141   | 0.0388  | 0.849        | 1               | 170.383 | 0.708   | 0.425        | 1               | 398.301 | 1.381  | 0.278        |
|        | Site                | 1             | 94.071   | 1.115   | 0.326        | 1             | 2.517   | 0.0236  | 0.882        | 1               | 20.123  | 0.0836  | 0.780        | 1               | 326.229 | 1.131  | 0.323        |
|        | [iHg]*Site          | 1             | 242.130  | 2.871   | 0.134        | 1             | 37.843  | 0.355   | 0.540        | 1               | 1364.44 | 5.669   | <b>0.044</b> | 1               | 1232.15 | 4.273  | 0.078        |
|        | Error               | 7             | 84.350   |         |              | 7             | 106.632 |         |              | 8               | 240.697 |         |              | 7               | 288.369 |        |              |
| LPO    | [iHg]               | 1             | 2.29e-10 | 1.54e-5 | 0.997        | 1             | 2.58e-4 | 7.838   | <b>0.023</b> | 1               | 3.74e-5 | 4.825   | 0.059        | 1               | 3.21e-5 | 7.353  | 0.027        |
|        | Site                | 1             | 6.30e-5  | 4.231   | 0.074        | 1             | 5.20e-6 | 0.158   | 0.702        | 1               | 2.09e-6 | 0.269   | 0.618        | 1               | 7.78e-6 | 1.781  | 0.219        |
|        | [iHg]*Site          | 1             | 3.61e-7  | 0.0243  | 0.880        | 1             | 2.37e-9 | 7.18e-5 | 0.993        | 1               | 2.06e-6 | 0.265   | 0.620        | 1               | 7.30e-6 | 1.673  | 0.232        |
|        | Error               | 8             | 1.49e-5  |         |              | 8             | 3.29e-5 |         |              | 8               | 7.75e-6 |         |              | 8               | 4.37e-6 |        |              |

\* Although the effects of the factor were significant in the omnibus ANOVA, post-hoc tests did not resolve any significant difference between sites or between treatments; \*Homocedasticity failed (Levene's test;  $p < 0.05$ ), despite several attempts to transform the data – parametric ANOVA was still run, considering that very few cases occurred and to keep consistency across the analysis.

**Table S4.** Two-way ANOVA summary regarding the inspection of significant effects of iHg concentration, site of origin of tested plants, and their interactions, for Fv/Fm measured following 2 or 4 h of exposure in experiments held during the day or night. ANOVA assumptions of normality and homocedasticity were met in all analyses, as confirmed by the Shapiro-Wilk test ( $p > 0.05$ ) and the Levene's test ( $p > 0.05$ ), respectively.

| WINTER              |               |         |       |       |               |         |        |       |                 |         |        |       |                 |         |        |       |
|---------------------|---------------|---------|-------|-------|---------------|---------|--------|-------|-----------------|---------|--------|-------|-----------------|---------|--------|-------|
|                     | DAY . t = 2 h |         |       |       | DAY . t = 4 h |         |        |       | NIGHT . t = 2 h |         |        |       | NIGHT . t = 4 h |         |        |       |
| Source of variation | df            | MS      | F     | P     | df            | MS      | F      | P     | df              | MS      | F      | P     | df              | MS      | F      | P     |
| [iHg]               | 1             | 1.92e-4 | 2.118 | 0.184 | 1             | 0.00811 | 6.581  | 0.033 | 1               | 9.36e-4 | 0.476  | 0.510 | 1               | 0.00270 | 1.361  | 0.277 |
| Site                | 1             | 1.92e-4 | 2.118 | 0.184 | 1             | 0.00224 | 1.818  | 0.214 | 1               | 0.00264 | 1.342  | 0.280 | 1               | 0.00546 | 2.753  | 0.136 |
| [iHg]*Site          | 1             | 1.61e-4 | 1.779 | 0.219 | 1             | 0.00480 | 3.894  | 0.084 | 1               | 2.70e-5 | 0.0137 | 0.910 | 1               | 9.01e-4 | 0.454  | 0.519 |
| Error               | 8             | 9.07e-5 |       |       | 8             | 0.00123 |        |       | 8               | 0.00197 |        |       | 8               | 0.00198 |        |       |
| SUMMER              |               |         |       |       |               |         |        |       |                 |         |        |       |                 |         |        |       |
|                     | DAY . t = 2 h |         |       |       | DAY . t = 4 h |         |        |       | NIGHT . t = 2 h |         |        |       | NIGHT . t = 4 h |         |        |       |
| Source of variation | df            | MS      | F     | P     | df            | MS      | F      | P     | df              | MS      | F      | P     | df              | MS      | F      | P     |
| [iHg]               | 1             | 6.58e-4 | 0.992 | 0.353 | 1             | 2.02e-6 | 0.0016 | 0.969 | 1               | 1.20e-4 | 0.0736 | 0.793 | 1               | 4.11e-5 | 0.0784 | 0.787 |
| Site                | 1             | 1.64e-3 | 2.473 | 0.160 | 1             | 1.21e-3 | 0.945  | 0.360 | 1               | 1.83e-3 | 1.120  | 0.321 | 1               | 3.98e-4 | 0.760  | 0.409 |
| [iHg]*Site          | 1             | 6.66e-4 | 1.004 | 0.350 | 1             | 4.35e-4 | 0.340  | 0.576 | 1               | 2.42e-3 | 1.483  | 0.258 | 1               | 2.84e-4 | 0.542  | 0.483 |
| Error               | 7             | 0.0047  |       |       | 8             | 0.0102  |        |       | 8               | 1.64e-3 |        |       | 8               | 5.24e-4 |        |       |
